# Supplementary material for: Healthcare Workers after Two Years of COVID-19: The Consequences of the Pandemic on Psychological Health and Sleep among Nurses and Physicians
Source: MDPI journal article supplement (doi:10.3390/ijerph20021410), 2023-01-12
Supplement: s1 [file s1]

## Supplemental material

### Supplementary Materials S1: Checklist for Reporting Results of Internet E-Surveys (CHERRIES)

| <b>Checklist Item</b>                    | <b>Explanation</b>                                                                                                                                                                             |
|------------------------------------------|------------------------------------------------------------------------------------------------------------------------------------------------------------------------------------------------|
| Describe survey design                   | All nurses and medical doctors of the ASL Roma 6 (local health units) were individually invited via mail to participate.                                                                       |
| IRB approval                             | The study has been approved by the local Ethics Committee (Comitato Etico "LAZIO 2", prot. N. 0223816/2021).                                                                                   |
| Informed consent                         | Informed consent was obtained at the beginning of the survey. The form included a brief description of the survey, its questionnaires, its purpose, and approximate time taken to complete it. |
| Data protection                          | No personally identifiable information was collected to guarantee anonymity. Identification codes were created to anonymize personal data.                                                     |
| Development and testing                  | The survey was piloted before the process of data collection, to ensure the usability and technical functionality of the electronic questionnaire.                                             |
| Open survey versus closed survey         | The survey was closed-type and targeted to the healthcare operators of ASL Roma 6.                                                                                                             |
| Contact mode                             | Investigators sent out the link to the survey by mail, allowing for web-based data entry.                                                                                                      |
| Advertising the survey                   | This survey was not advertised.                                                                                                                                                                |
| Web/E-mail                               | This was an e-survey with a link sent out through e-mail to potential participants (all nurses and medical doctors of the ASL Roma 6). Google Forms was used for capturing responses.          |
| Context                                  | The survey was not posted on any web site.                                                                                                                                                     |
| Mandatory/voluntary                      | The survey was voluntary.                                                                                                                                                                      |
| Incentives                               | No monetary incentives were offered to participants.                                                                                                                                           |
| Time/Date                                | The survey was enabled from February 2022 to June 2022 (five months).                                                                                                                          |
| Randomization of items or questionnaires | Items were presented in a fixed order.                                                                                                                                                         |
| Adaptive questioning                     | Adaptive questioning was applied to reduce number and complexity of the questions.                                                                                                             |
| Number of Items                          | The survey included 91 items.                                                                                                                                                                  |
| Number of screens (pages)                | The survey included 4 pages:<br>First page: Informed consent<br>Second page: 29 item<br>Third page: 31 item<br>Fourth page: 31 item                                                            |

|                                                                                                           |                                                                                                                             |
|-----------------------------------------------------------------------------------------------------------|-----------------------------------------------------------------------------------------------------------------------------|
| Completeness check                                                                                        | The survey was built to have mandatory responses to all questions.                                                          |
| Review step                                                                                               | Respondents were able to review and change their answers through a Back button.                                             |
| Unique site visitor                                                                                       | N/A                                                                                                                         |
| View rate (Ratio of unique survey visitors/unique site visitors)                                          | N/A                                                                                                                         |
| Participation rate (Ratio of unique visitors who agreed to participate/unique first survey page visitors) | N/A                                                                                                                         |
| Completion rate (Ratio of users who finished the survey/users who agreed to participate)                  | A total of 287 respondents agreed to participate and completed the survey.                                                  |
| Cookies used                                                                                              | We did not use any cookies.                                                                                                 |
| IP check                                                                                                  | We did not use IP address.                                                                                                  |
| Log file analysis                                                                                         | We did not use any log file analysis.                                                                                       |
| Registration                                                                                              | Identification codes were created at the beginning of the survey. Duplicates were removed (i.e., the first entry was kept). |
| Handling of incomplete questionnaires                                                                     | Only completed questionnaires were received and analyzed.                                                                   |
| Questionnaires submitted with an atypical timestamp                                                       | The timeframe was not used as a cut-off point.                                                                              |
| Statistical correction                                                                                    | We did not use weighting of items or propensity scores to adjust for the non-representative sample.                         |

This checklist has been modified from Eysenbach G. Improving the quality of Web surveys: the Checklist for Reporting Results of Internet E-Surveys (CHERRIES). J Med Internet Res. 2004 Sep 29;6(3):e34. doi: 10.2196/jmir.6.3.e34.

## **Supplementary Materials S2: Survey on Google Forms (Italian and English versions)**

*(Italian version)*

EMERGENZA COVID-19 E PROFESSIONI SANITARIE: IMPATTO SU SONNO, SALUTE  
PSICOLOGICA E QUALITÀ DELLA VITA NELLE DIVERSE FASI DELLA PANDEMIA

### **MODULO DI CONSENSO INFORMATO (prima pagina)**

#### **PRIMO BLOCCO (seconda pagina, 29 item)**

##### **INFORMAZIONI SOCIO-ANAGRAFICHE**

Istruzioni: In questa sezione le verranno richieste alcune informazioni anamnestiche preliminari che non consentiranno in alcun modo di risalire all'identità del singolo individuo. Le ricordiamo che il questionario è interamente anonimo e i dati verranno sfruttati solo per finalità statistiche, pertanto le chiediamo di rispondere con la massima onestà.

- Età \_\_\_\_\_
- Genere:
  - F
  - M
- Con chi vive attualmente?
  - Da solo
  - Famiglia d'origine
  - Compagno/a o marito/moglie e/o figli
  - Coinquilini/e
  - Altro: \_\_\_\_\_
- Con quante persone vive attualmente? \_\_\_\_\_
- Stato civile
  - Celibe/Nubile
  - Coniugato/a
  - Separato/a o Divorziato/a
  - Vedovo/a
- Titolo di studio:
  - Licenza Media
  - Diploma Scuola Superiore
  - Laurea Triennale
  - Laurea Magistrale, Specialistica o Vecchio Ordinamento
  - Dottorato di ricerca

- Altro: \_\_\_\_\_
- Condizione lavorativa attuale
  - Medico
  - Infermiere
  - Altro
- Per favore, indichi gli anni di anzianità di servizio: \_\_\_\_\_
- Stai attualmente lavorando in prima linea per l'emergenza COVID-19?
  - Sì
  - No
- E' mai risultato positivo al COVID-19 durante l'emergenza sanitaria?
  - Sì
  - No
- E' stata mai predisposta per lei una quarantena obbligatoria?
  - Sì
  - No
- Una persona a lei cara è risultata positiva al COVID-19 durante l'emergenza sanitaria?
  - Sì
  - No
- Ha perso dei cari a causa del COVID-19 durante l'emergenza sanitaria?
  - Sì
  - No
- Ritiene che le misure anti contagio adottate a livello statale siano adeguate?
  - Sì
  - No

### **SCALA di IMPATTO degli EVENTI**

Le seguenti affermazioni si riferiscono all'impatto dell'evento pandemico, con particolare riferimento alla sua fase più acuta. Indichi, per favore, con che frequenza si sono verificate le seguenti condizioni durante la fase acuta di pandemia, apponendo un segno di spunta sulla casella che corrisponde alla sua esperienza. Non ci sono risposte corrette o sbagliate. Punteggi: scala Likert da 1 ("Mai") a 4 ("Spesso")

1. Ci pensavo anche senza volerlo
2. Evitavo di lasciarmi coinvolgere quando ci pensavo o qualcuno me lo ricordava
3. Cercavo di cancellarlo dalla memoria

4. Avevo difficoltà a dormire o ad addormentarmi perché mi venivano in mente immagini o pensieri sull'accaduto
5. Avevo ondate di emozione sull'accaduto
6. Facevo dei sogni sull'accaduto
7. Mi tenevo alla larga da qualunque cosa potesse ricordarmelo
8. Mi sentivo come se non fosse accaduto o non fosse vero
9. Cercavo di non parlarne
10. Mi venivano in mente all'improvviso delle immagini dell'accaduto
11. Altre cose mi ci facevano pensare
12. Mi rendevo conto di avere ancora molte emozioni sull'accaduto, ma non me ne occupavo
13. Cercavo di non pensarci
14. Qualsiasi cosa collegata mi faceva ritornare in mente le emozioni legate all'accaduto
15. Le mie emozioni sul fatto erano come ovattate

## **SECONDO BLOCCO**

**N.B. I seguenti questionari sono stati compilati in riferimento a ciascun periodo della pandemia considerato:**

T1: Fase attuale (febbraio-giugno 2022) (SECONDO BLOCCO, parte 1) **(terza pagina, 31 item)**

T0: Fase pre-pandemica (gennaio-febbraio 2020) (SECONDO BLOCCO, parte 2) **(quarta pagina, 31 item)**

### **PSQI e PSQI-A**

- 1) A quale ora è solito disposto a letto?**

Ora \_\_\_\_\_

- 2) Quanto tempo (in minuti) ha impiegato mediamente per addormentarsi ogni sera?**

Minuti impiegati \_\_\_\_\_

- 3) A che ora si alza abitualmente?**

Ora \_\_\_\_\_

- 4) Quante ore di sonno effettivo ha ogni notte? (Le ore di sonno effettivo possono essere diverse dalle ore trascorse a letto)**

Ore \_\_\_\_\_

Per ciascuna delle domande che seguono, scelga la risposta migliore. Risponda per favore a tutte le domande.

- 5) Quante volte ha problemi di sonno per ciascuno dei seguenti motivi?**

**a) non riesce ad addormentarsi entro 30 minuti**

|          |                     |                     |                     |
|----------|---------------------|---------------------|---------------------|
|          | meno di una volta   | una o due volte     | tre o più volte     |
| mai ____ | alla settimana ____ | alla settimana ____ | alla settimana ____ |

**b) si sveglia nel mezzo della notte o al mattino presto**

|          |                     |                     |                     |
|----------|---------------------|---------------------|---------------------|
|          | meno di una volta   | una o due volte     | tre o più volte     |
| mai ____ | alla settimana ____ | alla settimana ____ | alla settimana ____ |

**c) fa uso del bagno**

|          |                     |                     |                     |
|----------|---------------------|---------------------|---------------------|
|          | meno di una volta   | una o due volte     | tre o più volte     |
| mai ____ | alla settimana ____ | alla settimana ____ | alla settimana ____ |

**d) non riesce a respirare correttamente**

|          |                     |                     |                     |
|----------|---------------------|---------------------|---------------------|
|          | meno di una volta   | una o due volte     | tre o più volte     |
| mai ____ | alla settimana ____ | alla settimana ____ | alla settimana ____ |

**e) tossisce o russa rumorosamente**

|          |                     |                     |                     |
|----------|---------------------|---------------------|---------------------|
|          | meno di una volta   | una o due volte     | tre o più volte     |
| mai ____ | alla settimana ____ | alla settimana ____ | alla settimana ____ |

**f) avverte troppo freddo**

|          |                     |                     |                     |
|----------|---------------------|---------------------|---------------------|
|          | meno di una volta   | una o due volte     | tre o più volte     |
| mai ____ | alla settimana ____ | alla settimana ____ | alla settimana ____ |

**g) avverte troppo caldo**

|          |                     |                     |                     |
|----------|---------------------|---------------------|---------------------|
|          | meno di una volta   | una o due volte     | tre o più volte     |
| mai ____ | alla settimana ____ | alla settimana ____ | alla settimana ____ |

**h) fa brutti sogni**

|          |                     |                     |                     |
|----------|---------------------|---------------------|---------------------|
|          | meno di una volta   | una o due volte     | tre o più volte     |
| mai ____ | alla settimana ____ | alla settimana ____ | alla settimana ____ |

**i) ha dei dolori**

|          |                     |                     |                     |
|----------|---------------------|---------------------|---------------------|
|          | meno di una volta   | una o due volte     | tre o più volte     |
| mai ____ | alla settimana ____ | alla settimana ____ | alla settimana ____ |

**l) per altri motivi. Li descriva per favore**

**Quante volte non riesce a dormire a causa del suddetto motivo**

|          |                     |                     |                     |
|----------|---------------------|---------------------|---------------------|
|          | meno di una volta   | una o due volte     | tre o più volte     |
| mai ____ | alla settimana ____ | alla settimana ____ | alla settimana ____ |

**6) Come valuta globalmente la qualità del suo sonno?**

Molto buona \_\_\_\_ abbastanza buona \_\_\_\_ abbastanza cattiva \_\_\_\_ molto cattiva \_\_\_\_

**7) Quante volte assume farmaci per dormire (prescritti dal medico o comunque ottenuti)?**

|          |                     |                     |                     |
|----------|---------------------|---------------------|---------------------|
|          | meno di una volta   | una o due volte     | tre o più volte     |
| mai ____ | alla settimana ____ | alla settimana ____ | alla settimana ____ |

**8) Quante volte ha difficoltà a stare sveglio durante la guida, durante il pasto o durante un'attività sociale?**

|          |                     |                     |                     |
|----------|---------------------|---------------------|---------------------|
|          | meno di una volta   | una o due volte     | tre o più volte     |
| mai ____ | alla settimana ____ | alla settimana ____ | alla settimana ____ |

**9) In che misura rappresenta per lei un problema avere abbastanza entusiasmo per fare ciò che deve fare?**

|                         |                             |                           |                                  |
|-------------------------|-----------------------------|---------------------------|----------------------------------|
| nessun<br>problema ____ | un piccolo<br>problema ____ | un certo<br>problema ____ | un problema<br>molto grosso ____ |
|-------------------------|-----------------------------|---------------------------|----------------------------------|

**10) Ha problemi mentre dorme poiché**

**a) sente vampate di calore:**

|  |                                                   |                                        |                                        |
|--|---------------------------------------------------|----------------------------------------|----------------------------------------|
|  | meno di una volta<br>mai ____ alla settimana ____ | una o due volte<br>alla settimana ____ | tre o più volte<br>alla settimana ____ |
|--|---------------------------------------------------|----------------------------------------|----------------------------------------|

**b) si sente nervosa:**

|  |                                                   |                                        |                                        |
|--|---------------------------------------------------|----------------------------------------|----------------------------------------|
|  | meno di una volta<br>mai ____ alla settimana ____ | una o due volte<br>alla settimana ____ | tre o più volte<br>alla settimana ____ |
|--|---------------------------------------------------|----------------------------------------|----------------------------------------|

**c) ha incubi o ricordi di esperienze traumatiche:**

|  |                                                   |                                        |                                        |
|--|---------------------------------------------------|----------------------------------------|----------------------------------------|
|  | meno di una volta<br>mai ____ alla settimana ____ | una o due volte<br>alla settimana ____ | tre o più volte<br>alla settimana ____ |
|--|---------------------------------------------------|----------------------------------------|----------------------------------------|

**d) ha ansia e panico, non connesso a ricordi traumatici:**

|  |                                                   |                                        |                                        |
|--|---------------------------------------------------|----------------------------------------|----------------------------------------|
|  | meno di una volta<br>mai ____ alla settimana ____ | una o due volte<br>alla settimana ____ | tre o più volte<br>alla settimana ____ |
|--|---------------------------------------------------|----------------------------------------|----------------------------------------|

**e) fa dei brutti sogni, non connessi a ricordi traumatici:**

|  |                                                   |                                        |                                        |
|--|---------------------------------------------------|----------------------------------------|----------------------------------------|
|  | meno di una volta<br>mai ____ alla settimana ____ | una o due volte<br>alla settimana ____ | tre o più volte<br>alla settimana ____ |
|--|---------------------------------------------------|----------------------------------------|----------------------------------------|

**f) ha esperienze di terrore o urla durante il sonno senza essere completamente sveglio:**

|  |                                                   |                                        |                                        |
|--|---------------------------------------------------|----------------------------------------|----------------------------------------|
|  | meno di una volta<br>mai ____ alla settimana ____ | una o due volte<br>alla settimana ____ | tre o più volte<br>alla settimana ____ |
|--|---------------------------------------------------|----------------------------------------|----------------------------------------|

**g) le capita di “agire” i suoi sogni, per esempio gridando, colpendo qualcosa, correndo o scalcando:**

|  |                                                   |                                        |                                        |
|--|---------------------------------------------------|----------------------------------------|----------------------------------------|
|  | meno di una volta<br>mai ____ alla settimana ____ | una o due volte<br>alla settimana ____ | tre o più volte<br>alla settimana ____ |
|--|---------------------------------------------------|----------------------------------------|----------------------------------------|

**DASS-21**

La scala di valutazione è la seguente:

0 = Non mi accade mai

1 = Mi capita qualche volta

2 = Mi capita con una certa frequenza

3 = Mi capita quasi sempre

1 Ho provato molta tensione e ho avuto difficoltà a recuperare uno stato di calma

2 Mi sono accorto di avere la bocca secca

- 3 Non riuscivo proprio a provare delle emozioni positive
- 4 Mi sono sentito molto in affanno con difficoltà a respirare (per es. respiro molto accelerato, sensazione di forte affanno in assenza di sforzo fisico)
- 5 Ho avuto un'estrema difficoltà nel cominciare quello che dovevo fare
- 6 Ho avuto la tendenza a reagire in maniera eccessiva alle situazioni
- 7 Ho avuto tremori (per es. alle mani)
- 8 Ho sentito che stavo impiegando molta energia nervosa
- 9 Ho temuto di trovarmi in situazioni in cui sarei potuto andare nel panico e rendermi ridicolo
- 10 Non vedevo nulla di buono nel mio futuro
- 11 Mi sono sentito stressato
- 12 Ho avuto difficoltà a rilassarmi
- 13 Mi sono sentito scoraggiato e depresso
- 14 Non riuscivo a tollerare per nulla eventi o situazioni che mi impedivano di portare avanti ciò che stavo facendo
- 15 Ho sentito di essere vicino ad avere un attacco di panico
- 16 Non c'era nulla che mi dava entusiasmo
- 17 Sentivo di valere poco come persona
- 18 Mi sono sentito piuttosto irritabile
- 19 Ho percepito distintamente il battito del mio cuore senza aver fatto uno sforzo fisico (per es. battito cardiaco accelerato o perdita di un battito)
- 20 Mi sono sentito spaventato senza ragione
- 21 Sentivo la vita priva di significato



**(English version)**

COVID-19 EMERGENCY AND HEALTHCARE PROFESSIONS: IMPACT ON SLEEP,  
PSYCHOLOGICAL HEALTH AND QUALITY OF LIFE IN THE DIFFERENT PHASES OF THE  
PANDEMIC

**Informed consent (first page)**

**FIRST BLOCK (second page, 29 items)**

**SOCIO-DEMOGRAPHIC INFORMATION**

Instructions: In this section you will be asked for some preliminary anamnestic information. We remind you that the questionnaire is entirely anonymous and the data will be used only for statistical purposes, therefore we ask you to respond with the utmost honesty.

- Age \_\_\_\_\_
- Gender:
  - ☐ F
  - ☐ M
- Who do you currently live with?
  - ☐ Alone
  - ☐ Parents
  - ☐ Partner or husband/wife and/or children
  - ☐ Roommates
  - ☐ other: \_\_\_\_\_
- How many people do you currently live with? \_\_\_\_\_
- Marital status
  - ☐ Single
  - ☐ Married
  - ☐ Separated o Divorced
  - ☐ Widower
- Qualification:
  - ☐ Middle License
  - ☐ High School Diploma
  - ☐ Bachelor's degree
  - ☐ Master's Degree
  - ☐ PhD
  - ☐ other: \_\_\_\_\_

- Current working condition
  - Medical doctor
  - Nurse
  - other
  
- Please indicate the years of service: \_\_\_\_\_
  
- Are you currently working on the front lines of the COVID-19 emergency?
  - Yes
  - No
  
- Have you ever tested positive for COVID-19 during the health emergency?
  - Yes
  - No
  
- Have you ever been subjected to a forced quarantine period?
  - Yes
  - No
  
- Have relatives or friends tested positive for COVID-19 during the health emergency??
  - Yes
  - No
  
- Did relatives or friends die from COVID-19 during the health emergency?
  - Yes
  - No
  
- Do you think that the national anti-contagion measures are adequate?
  - Yes
  - No

### **IMPACT OF EVENT SCALE**

The following statements refer to the impact of the pandemic event, with particular reference to its most acute phase. Please indicate how often the following conditions occurred during the acute phase of the pandemic by ticking the box that corresponds to your experience. There are no right or wrong answers.

Scores: Likert scale from 1 ("Never") to 4 ("Often").

1. I thought about it even when I did not mean to
2. I avoided letting myself get upset when
3. I tried to remove it from my memory

4. I had trouble falling asleep or staying asleep because pictures or thoughts about it came into my mind
5. I had waves of strong feelings about it
6. I had dreams about it
7. I stayed away from reminders of it
8. I felt as if it hadn't happened or it wasn't real
9. I tried not to talk about it
10. Pictures about it popped into my mind
11. Other things kept making me think about it
12. I was aware that I still had a lot of feelings about it, but I didn't deal with them
13. I tried not to think about it
14. Any reminder brought back feelings about it
15. My feelings about it were kind of numb

## **SECOND BLOCK**

**N.B. The following questionnaires were completed with reference to a specific period of the pandemic:**

T1: Current phase (February-June 2022) (SECOND BLOCK, part 1) (**third page, 31 items**)

T0: Pre-pandemic period (January-February 2020) (SECOND BLOCK, part 2) (**fourth page, 31 items**)

## **PSQI and PSQI-A**

- 1) When have you usually gone to bed at night?**

USAL BED TIME \_\_\_\_\_

- 2) How long (in minutes) has it usually take you to fall asleep each night?**

MINUTES \_\_\_\_\_

- 3) When have you usually gotten up in the morning??**

USUAL GETTING UP TIME \_\_\_\_\_

- 4) How many hours of actual sleep did you get at night? (This may be different than the number of hours you spend in bed.)**

HOURS OF SLEEP PER NIGHT \_\_\_\_\_

For each of the remaining questions, check the one best response. Please answer all questions.

- 5) How often have you had trouble sleeping because you...**

**a) Cannot get to sleep within 30 minutes**

Less than once a week \_\_\_\_\_ Once or twice a week \_\_\_\_\_ Three or more times a week \_\_\_\_\_

**b) Wake up in the middle of the night or early morning**

Less than once a week \_\_\_\_\_ Once or twice a week \_\_\_\_\_ Three or more times a week \_\_\_\_\_

|                                                                                       |      |      |      |      |      |        |                     |
|---------------------------------------------------------------------------------------|------|------|------|------|------|--------|---------------------|
| Never                                                                                 | ___  | week | ___  | week | ___  | a week | ___                 |
| <b>c) Have to get up to use the bathroom</b>                                          |      |      |      |      |      |        |                     |
|                                                                                       | Less | than | once | a    | Once | or     | twice               |
| Never                                                                                 | ___  | week | ___  | week | ___  | a      | Three or more times |
|                                                                                       |      |      |      |      |      |        | a week              |
| <b>d) Cannot breathe comfortably</b>                                                  |      |      |      |      |      |        |                     |
|                                                                                       | Less | than | once | a    | Once | or     | twice               |
| Never                                                                                 | ___  | week | ___  | week | ___  | a      | Three or more times |
|                                                                                       |      |      |      |      |      |        | a week              |
| <b>e) Cough or snore loudly</b>                                                       |      |      |      |      |      |        |                     |
|                                                                                       | Less | than | once | a    | Once | or     | twice               |
| Never                                                                                 | ___  | week | ___  | week | ___  | a      | Three or more times |
|                                                                                       |      |      |      |      |      |        | a week              |
| <b>f) Feel too cold</b>                                                               |      |      |      |      |      |        |                     |
|                                                                                       | Less | than | once | a    | Once | or     | twice               |
| Never                                                                                 | ___  | week | ___  | week | ___  | a      | Three or more times |
|                                                                                       |      |      |      |      |      |        | a week              |
| <b>g) Feel too hot</b>                                                                |      |      |      |      |      |        |                     |
|                                                                                       | Less | than | once | a    | Once | or     | twice               |
| Never                                                                                 | ___  | week | ___  | week | ___  | a      | Three or more times |
|                                                                                       |      |      |      |      |      |        | a week              |
| <b>h) Had bad dreams</b>                                                              |      |      |      |      |      |        |                     |
|                                                                                       | Less | than | once | a    | Once | or     | twice               |
| Never                                                                                 | ___  | week | ___  | week | ___  | a      | Three or more times |
|                                                                                       |      |      |      |      |      |        | a week              |
| <b>i) Have pain</b>                                                                   |      |      |      |      |      |        |                     |
|                                                                                       | Less | than | once | a    | Once | or     | twice               |
| Never                                                                                 | ___  | week | ___  | week | ___  | a      | Three or more times |
|                                                                                       |      |      |      |      |      |        | a week              |
| <b>j) Other reason(s), please describe _____</b>                                      |      |      |      |      |      |        |                     |
| <b>How often during the past month have you had trouble sleeping because of this?</b> |      |      |      |      |      |        |                     |
|                                                                                       | Less | than | once | a    | Once | or     | twice               |
| Never                                                                                 | ___  | week | ___  | week | ___  | a      | Three or more times |
|                                                                                       |      |      |      |      |      |        | a week              |

**6) How would you rate your sleep quality overall?**

Very good \_\_\_ Fairly good \_\_\_ Fairly bad \_\_\_ Very bad \_\_\_

**7) How often have you taken medicine (prescribed or “over the counter”) to help you sleep?**

|       |                       |                 |                     |
|-------|-----------------------|-----------------|---------------------|
|       | Less than once a week | Once or twice a | Three or more times |
| Never | ___                   | week            | a week              |

**8) How often have you had trouble staying awake while driving, eating meals, or engaging in social activity?**

|       |                       |                 |                     |
|-------|-----------------------|-----------------|---------------------|
|       | Less than once a week | Once or twice a | Three or more times |
| Never | ___                   | week            | a week              |

**9) How much of a problem has it been for you to keep up enough enthusiasm to get things done?**

No problem at \_\_\_ Only a very slight \_\_\_ Somewhat of \_\_\_ A very big problem

all\_\_\_ problem \_\_\_ problem \_\_\_

**10) How often have you had trouble sleeping because you...**

**a) Feel hot flashes:**

Less than once a    Once or twice a    Three or more times  
Never \_\_\_ week \_\_\_    week \_\_\_    a week \_\_\_

**b) Feel general nervousness:**

Less than once a    Once or twice a    Three or more times  
Never \_\_\_ week \_\_\_    week \_\_\_    a week \_\_\_

**c) Had memories or nightmares of a traumatic experience:**

Less than once a    Once or twice a    Three or more times  
Never \_\_\_ week \_\_\_    week \_\_\_    a week \_\_\_

**d) Had severe anxiety or panic, not related to traumatic memories:**

Less than once a    Once or twice a    Three or more times  
Never \_\_\_ week \_\_\_    week \_\_\_    a week \_\_\_

**e) Had bad dreams, not related to traumatic memories:**

Less than once a    Once or twice a    Three or more times  
Never \_\_\_ week \_\_\_    week \_\_\_    a week \_\_\_

**f) Had episodes of terror or screaming during sleep without fully awakening:**

Less than once a    Once or twice a    Three or more times  
Never \_\_\_ week \_\_\_    week \_\_\_    a week \_\_\_

**g) Had episodes of "acting out" your dreams, such as kicking, punching, running, or screaming:**

Less than once a    Once or twice a    Three or more times  
Never \_\_\_ week \_\_\_    week \_\_\_    a week \_\_\_

**DASS-21**

The rating scale is as follows:

0 = Did not apply to me at all

1 = Applied to me to some degree, or some of the time

2 = Applied to me to a considerable degree or a good part of time

3 = Applied to me very much or most of the time

1        I found it hard to wind down

2        I was aware of dryness of my mouth

3        I couldn't seem to experience any positive feeling at all

4        I experienced breathing difficulty (e.g. excessively rapid breathing, breathlessness in the absence of physical exertion)

- 5 I found it difficult to work up the initiative to do things
- 6 I tended to over-react to situations
- 7 I experienced trembling (e.g. in the hands)
- 8 I felt that I was using a lot of nervous energy
- 9 I was worried about situations in which I might panic and make a fool of myself
- 10 I felt that I had nothing to look forward to
- 11 I found myself getting agitated
- 12 I found it difficult to relax
- 13 I felt down-hearted and blue
- 14 I was intolerant of anything that kept me from getting on with what I was doing
- 15 I felt I was close to panic
- 16 I was unable to become enthusiastic about anything
- 17 I felt I wasn't worth much as a person
- 18 I felt that I was rather touchy
- 19 I was aware of the action of my heart in the absence of physical exertion (e.g. sense of heart rate increase, heart missing a beat)
- 20 I felt scared without any good reason
- 21 I felt that life was meaningless
